# Supplementary material for: Chronic cigarette smoke exposure induces systemic hypoxia that drives intestinal dysfunction
Source: JCI journal article supplement (doi:10.1172/jci.insight.94040), 2018-02-07
Supplement: sd1 [file 1]

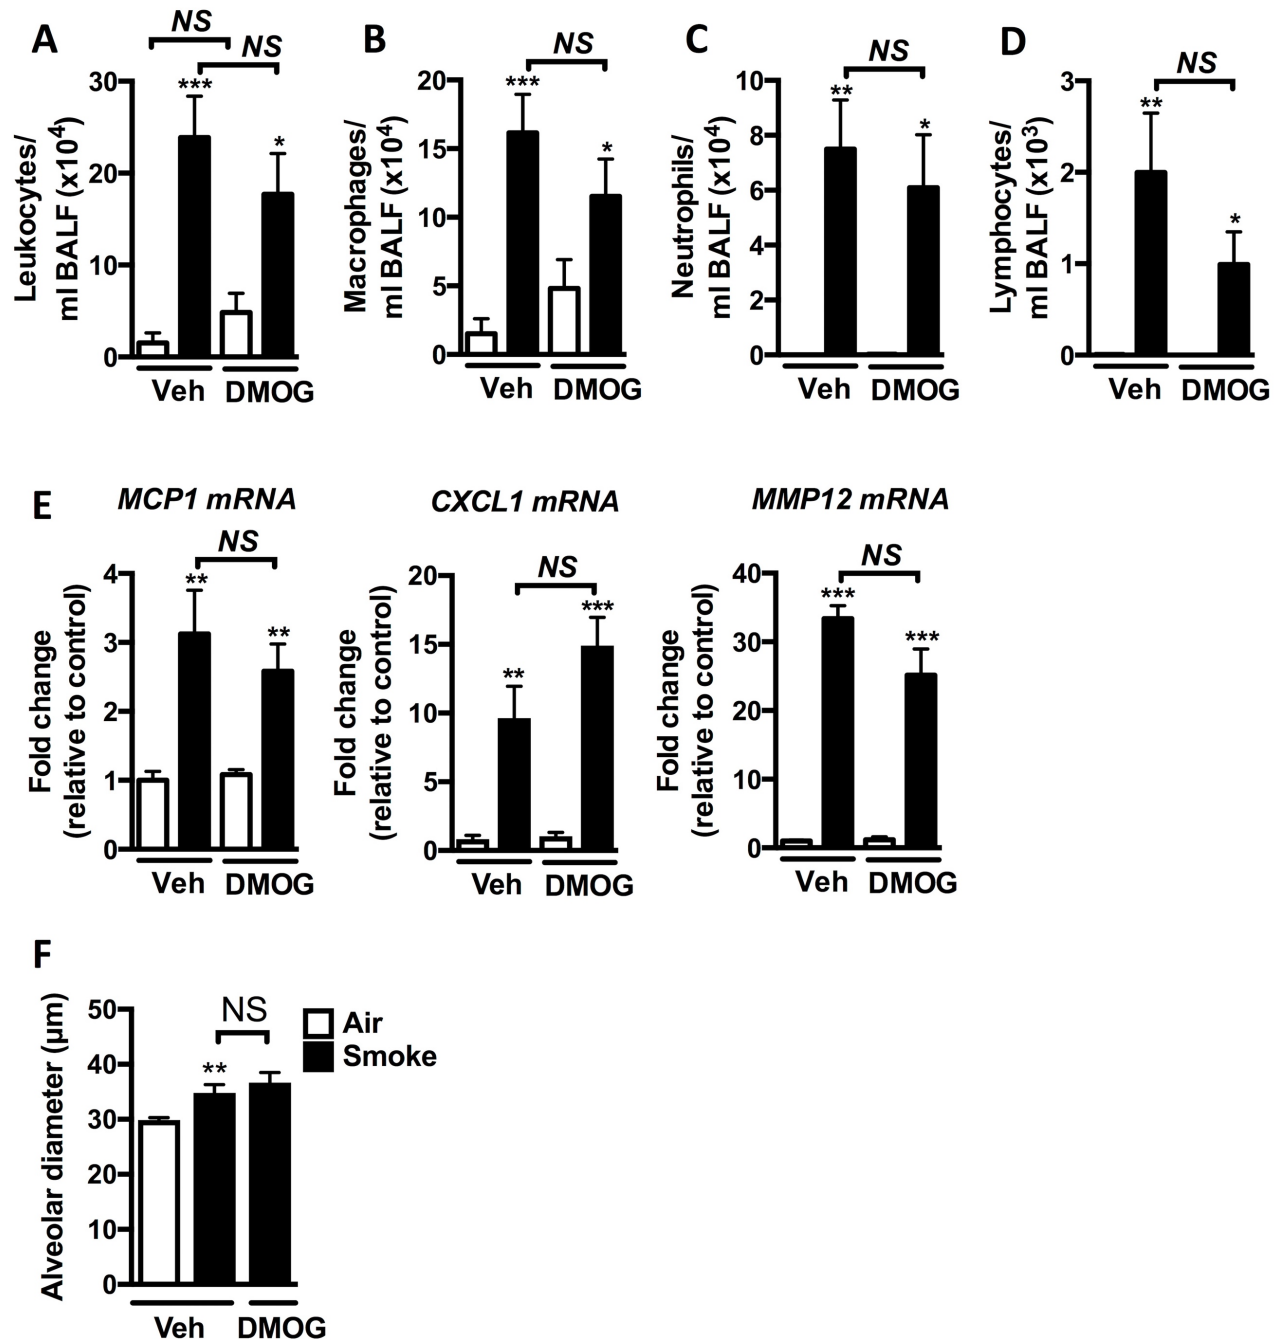

**Supplemental figure 1. Systemic DMOG treatment during chronic CS exposure does not affect CS-induced pulmonary inflammation and damage in experimental COPD.**

Mice were exposed to CS for 8 weeks to induce experimental COPD and were treated systemically with DMOG throughout. (a-d) Enumeration of BALF leukocytes revealed no significant effect of DMOG on the accumulation of leukocytes in the airways of CS-exposed groups. (e) mRNA expression of key inflammatory and pathogenic mediators MCP1, CXCL1 and MMP12 was not altered by DMOG treatment. (f) DMOG treatment did not prevent CS-induced alveolar enlargement.  $n = 4-6$ , \* =  $p \leq 0.05$ , \*\* =  $p \leq 0.01$ , \*\*\* =  $p \leq 0.001$ .
